# Supplementary material for: Downregulation of aquaporin 3 promotes hyperosmolarity-induced apoptosis of nucleus pulposus cells through PI3K/Akt/mTOR pathway suppression
Source: Research Square preprint supplement (doi:10.21203/rs.3.rs-7513721/v1), 2025-09-15
Supplement: Supplementary file 1 [file 30f4e1eab1b5693e98b3c21f.docx]

| **Material/Equipment** | **Catalog Number** | **Company** | **Country** |
| --- | --- | --- | --- |
| Trypsin-EDTA | T4049 | Sigma-Aldrich | USA |
| Collagenase type II | C2-BIOC | Sigma-Aldrich | USA |
| FBS | A3160802 | Gibco | USA |
| DMEM/F12 | 11320033 | Gibco | USA |
| 70 μm nylon mesh | 352350 | Corning | USA |
| Penicillin-streptomycin | 15140122 | Gibco | USA |
| Ascorbic acid | A4544 | Sigma-Aldrich | USA |
| Sodium chloride | S805280 | Macklin | China |
| Freezing-point osmometer | FM-8P | Shanghai Medical College Instrument Co., Ltd. | China |
| Annexin V-FITC/PE Apoptosis Detection Kit | KGA1102 | KeyGEN BioTECH | China |
| FACSCalibur system | / | BD Biosciences | CA |
| Caspase-3 Activity Assay Kit | C1168S | Beyotime Biotechnology | China |
| Leica DMi8 inverted microscope | / | Leica Microsystems | Germany |
| RIPA lysis buffer | P0013B | Beyotime Biotechnology | China |
| BCA assay kit | 23225 | Thermo Fisher Scientific | USA |
| SDS-PAGE | P0012A | Beyotime Biotechnology | China |
| PVDF membranes | IPVH00010 | Merck Millipore | USA |
| Anti-Bax antibody | ab32503 | Abcam | UK |
| Anti-Bcl-2 antibody | ab59348 | Abcam | UK |
| Anti-type II collagen antibody | 600-403-104 | Thermo Fisher Scientific | USA |
| Anti-MMP3 antibody | ab52915 | Abcam | UK |
| Anti-AQP3 antibody | ab307969 | Abcam | UK |
| Anti-mTOR antibody | 2983 | Cell Signaling Technology | USA |
| Anti-p-mTOR antibody | 5536 | Cell Signaling Technology | USA |
| Anti-PI3K antibody | 4249 | Cell Signaling Technology | USA |
| Anti-p-PI3K antibody | 13857 | Cell Signaling Technology | USA |
| Anti-Akt antibody | 2920 | Cell Signaling Technology | USA |
| Anti-p-Akt antibody | 4060 | Cell Signaling Technology | USA |
| Anti-β-actin antibody | 93473 | Cell Signaling Technology | USA |
| Tween-20 | ST671 | Beyotime Biotechnology | China |
| Goat anti-mouse IgG antibody | 7076 | Cell Signaling Technology | USA |
| Goat anti-rabbit IgG antibody | 7074 | Cell Signaling Technology | USA |
| ECL kit | A38556 | Thermo Fisher Scientific | USA |
| ImageJ software | / | National Institutes of Health | USA |
| Cell Counting Kit-8 | / | Dojindo Laboratories | Japan |
| DCFDA Cellular ROS Detection Assay Kit | ab113851 | Abcam | UK |
| MitoSOX Red mitochondrial superoxide indicator | M36008 | Thermo Fisher Scientific | MA |
| MitoTracker Green FM | C1048 | Beyotime Biotechnology | China |
| Commercial kit | RK09070 | ABclonal | China |
| NADPH oxidation kinetics with a kit | EEA010 | Thermo Fisher Scientific | MA |
| JC-1 assay kit | C2006 | Beyotime Biotechnology | China |
| fluorescence microscope | DMi8 | Leica Microsystems | Germany |
| FACSCalibur flow cytometer | / | BD Biosciences | USA |
| TRIzol | 15596026 | Thermo Fisher Scientific | USA |
| pAAV-MCS vector | / | Agilent Technologies | USA |
| Sanger sequencing | / | GENEWIZ | China |
| Poly-L-lysine-coated glass coverslips | 0111520 | Thermo Fisher Scientific | USA |
| 6-well plates | 140675 | Nunc | Denmark |
| Lipofectamine 2000 | 11668019 | Thermo Fisher Scientific | USA |
| Serum medium | 31985062 | Gibco | USA |
| HEK293T cells | CRL-3216 | ATCC | USA |
| Sodium deoxycholate | D6750 | Sigma-Aldrich | USA |
| Ultracentrifugation | Optima XE-90 | Beckman Coulter | USA |
| Sorbitol | S3889 | Sigma-Aldrich | USA |
| Sodium pentobarbital | P3761 | Sigma-Aldrich | USA |
| Fluoroscopic guidance | C-arm Ziehm Vision RFD 3D | / | Germany |
| 26-gauge spinal needle | 405210 | B. Braun | Germany |
| Meloxicam | M3937 | Sigma-Aldrich | USA |
| Calibrated scales | XB220A | Precisa | Switzerland |
| SkyScan 1276 system | / | Bruker | Germany |
| 3T clinical scanner | / | Siemens Healthineers | Germany |
| PFA | P6148 | Sigma-Aldrich | USA |
| EDTA | E4884 | Sigma-Aldrich | USA |
| Xylene | 534056 | Sigma-Aldrich | USA |
| Paraffin | 76242 | Leica | Germany |
| HistoStar embedding station | / | Thermo Fisher Scientific | MA |
| Poly-L-lysine-coated slides | S8902 | Solarbio | China |
| Mayer's hematoxylin | HXG732 | Baso | China |
| Eosin Y | HT110232 | Sigma-Aldrich | USA |
| Safranin O | S8884 | Sigma-Aldrich | USA |
| Fast Green FCF | FCF-1 | Sigma-Aldrich | USA |
